# Supplementary material for: Hydrogen bond mediated intermolecular magnetic coupling in mononuclear high spin iron(iii) Schiff base complexes: synthesis, structure and magnetic study with theoretical insight
Source: Royal Society of Chemistry journal article supplement (doi:10.1039/d0ra09425k), 2021-01-01
Supplement: d0ra09425k1.pdf [file d0ra09425k1.pdf]

(Electronic Supplementary Information)

**Hydrogen bond mediated intermolecular magnetic coupling in mononuclear high spin iron(III) Schiff base complexes: Synthesis, structure and magnetic study with theoretical insight**

Tanmoy Basak,<sup>a</sup> Carlos J. Gómez-García,<sup>b</sup> Rosa M. Gomila,<sup>c</sup> Antonio Frontera,<sup>d</sup> Shouvik

Chattopadhyay<sup>a,\*</sup>

**Table: S1** Selected bond angles (°) in complexes **1** and **2**.

| Atoms     | 1         | 2          | Atoms      | 1         | 2          |
|-----------|-----------|------------|------------|-----------|------------|
| O1-Fe1-N1 | 93.57(9)  | 95.0(2)    | N2-Fe1-N4  | 89.05(9)  | 97.2(2)    |
| O1-Fe1-N2 | 163.15(9) | 162.26(19) | N2-Fe1-N5  | 96.59(9)  | –          |
| O1-Fe1-N3 | 87.25(9)  | 85.8(2)    | N3-Fe1-N4  | 91.56(9)  | 172.5(2)   |
| O1-Fe1-N4 | 100.80(9) | 98.1(2)    | N3-Fe1-N5  | 175.36(9) | –          |
| O1-Fe1-N5 | 97.38(9)  | –          | N4-Fe1-N5  | 88.01(10) | –          |
| N1-Fe1-N2 | 78.02(9)  | 78.0(2)    | Cl1-Fe1-O1 | –         | 96.46(15)  |
| N1-Fe1-N3 | 93.20(10) | 90.8(2)    | Cl1-Fe1-N1 | –         | 167.29(19) |
| N1-Fe1-N4 | 165.06(9) | 82.6(3)    | Cl1-Fe1-N2 | –         | 92.41(16)  |
| N1-Fe1-N5 | 86.10(11) | –          | Cl1-Fe1-N3 | –         | 95.43(14)  |
| N2-Fe1-N3 | 78.78(9)  | 78.03(18)  | Cl1-Fe1-N4 | –         | 90.5(2)    |

## IR and UV-Vis spectra

The IR and electronic spectra of both complexes are in good agreement with their molecular structures. The IR spectra of both complexes exhibit strong bands at  $\sim 1580\text{ cm}^{-1}$ , corresponding to the azomethine (C=N) stretching vibrations.<sup>1</sup> In complex **1**, there is a bifurcated sharp band at  $2075\text{ cm}^{-1}$  and  $2042\text{ cm}^{-1}$  attributed to the two terminal thiocyanate groups.<sup>2</sup> Complex **2** shows a sharp band around  $2040\text{ cm}^{-1}$ , due to the presence of the terminal azide ligand.<sup>3</sup> Both complexes show weak bands at  $\sim 3227\text{ cm}^{-1}$  due to the N-H stretching vibrations of the primary amine group and another weak bands at  $\sim 3134\text{ cm}^{-1}$ , corresponding to the N-H stretching vibrations of the secondary amine group.<sup>4</sup> In both cases, the C-H stretching vibrations appear in the range  $2866\text{--}2944\text{ cm}^{-1}$ .<sup>5</sup> IR spectra of both complexes are shown in Fig.

**S1.**

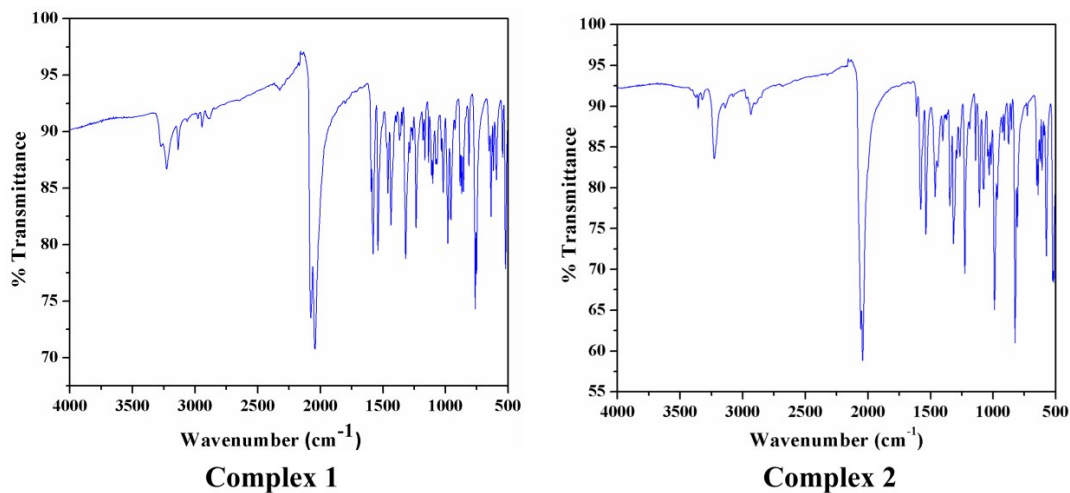

**Fig. S1:** IR spectra of complexes **1** (left) and **2** (right).

The colors of solid microcrystalline products of both complexes **1** and **2** are dark green and the colors of  $10^{-4}\text{ M}$  solutions of both complexes are light green. The electronic absorption

spectra of complexes **1** and **2** show similar features. The band (at 515 nm for **1** and 520 nm for **2**) in the electronic spectrum of each complex may be originated from d-d transition. The intensity of this band is weak as the d-d transitions in any  $d^5$  iron(III) complex is forbidden by both Laporte and spin selection rules. A stronger band (at 330 nm in both complexes) may tentatively be assigned to a superposition of the amine-to-iron(III), azide to iron(II) and phenoxido-to-iron(III) charge transfer transitions.<sup>6-9</sup> For both complexes, bands around 230 and 270 nm may be assigned as intra-ligand  $\pi \rightarrow \pi^*$  and  $n \rightarrow \pi^*$  transitions, respectively.<sup>10</sup> The band positions and intensities are comparable with those found in similar complexes.<sup>6,7</sup> UV-Vis spectra of both complexes are shown in Fig. **S2**.

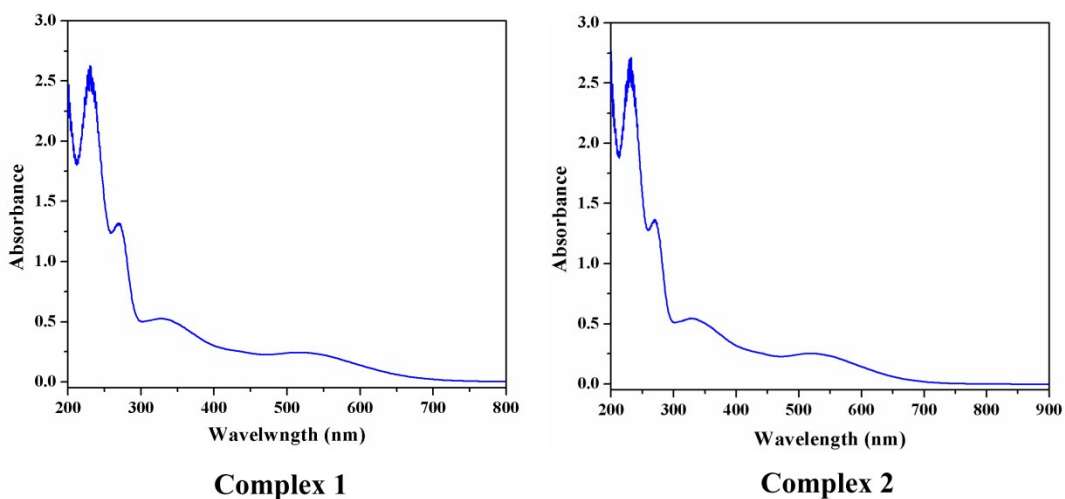

**Fig. S2:** UV-Vis spectra of complexes **1** (left) and **2** (right).

## Curie-Weiss plots

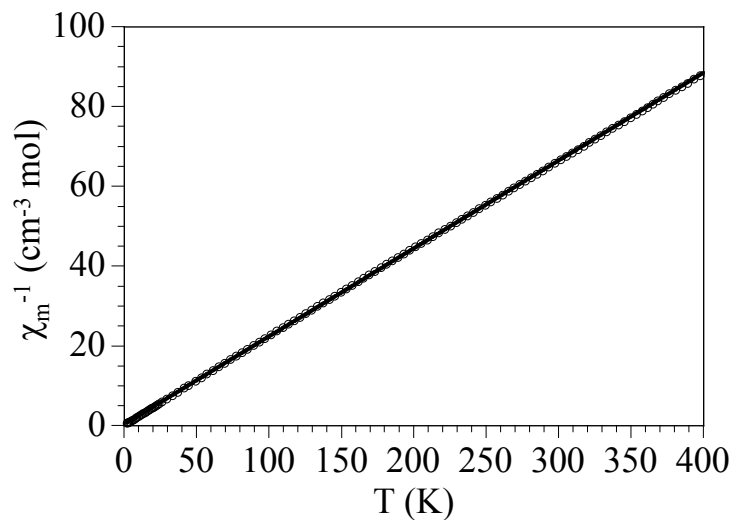

**Fig. S3:** Curie plot for complex 1. Solid line is the best fit to the Curie-Weiss law with  $C = 4.54 \text{ cm}^3 \text{ K mol}^{-1}$  and  $\theta = -1.61 \text{ K} = -1.12 \text{ cm}^{-1}$ .

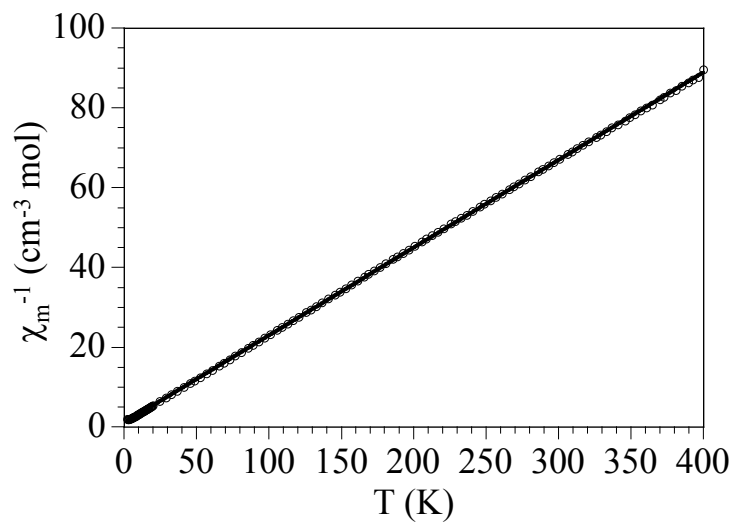

**Fig. S4:** Curie plot for complex 2. Solid line is the best fit to the Curie-Weiss law with  $C = 4.55 \text{ cm}^3 \text{ K mol}^{-1}$  and  $\theta = -4.73 \text{ K} = -3.29 \text{ cm}^{-1}$ .

**Table S2:** Ligands name of the following complexes mentioned in Table 5.

| Complex                                                                                                                          | CSD code/<br>CCDC no. | Ligands                                                                                                 |
|----------------------------------------------------------------------------------------------------------------------------------|-----------------------|---------------------------------------------------------------------------------------------------------|
| $[\text{Cu}_2(\text{L}^{\text{a}})_2]$                                                                                           | -                     | $\text{L}^{\text{a}} = 2,2'-[(1,3\text{-dimethyl-1,3-propanediylidene)dinitrilo}]_{\text{bis-ethanol}}$ |
| $[\text{Cu}_2(\text{L}^{\text{a}})_2]$                                                                                           | HEAICU10              | $\text{L}^{\text{a}} = 2,2'-[(1,3\text{-dimethyl-1,3-propanediylidene)dinitrilo}]_{\text{bis-ethanol}}$ |
| $[\text{Cu}_3(\text{L}^{\text{b}})_2(\text{C}_6\text{H}_5\text{COO})_2\text{Cl}]\text{Cl}$                                       | DEPSAT                | $\text{L}^{\text{b}} = 2\text{-}(2\text{-Hydroxyphenylmethylaminomethyl})\text{pyridine}$               |
| $[\text{Cu}_2(\mu_2\text{-H}_2\text{O})(\text{L}^{\text{c}})_2(\text{H}_2\text{O})_2](\text{ClO}_4)_2 \cdot 2\text{H}_2\text{O}$ | KEDNIR                | $\text{L}^{\text{c}} = 2\text{-}[1\text{-}[2\text{-}(Dimethylamino)ethyl]imino]ethyl]phenol$            |
| $[\text{Cu}_2(\text{L}^{\text{d}})_2(\text{H}_2\text{O})_2(\text{ClO}_4)](\text{ClO}_4) \cdot \text{H}_2\text{O}$                | FUTCON                | $\text{L}^{\text{d}} = 2\text{-}((2\text{-}(Pyridin-2\text{-yl)hydrazono)methyl})phenol$                |
| $[\text{Cu}(\text{L}^{\text{e}})_2(\text{H}_2\text{O})]$                                                                         | BEYRAY                | $\text{L}^{\text{e}} = 2\text{-Carboxypyrazine}$                                                        |
| $[\text{Zn}^{\text{II}}(\text{H}_2\text{O})_6][\text{Cu}^{\text{II}}(\text{L}^{\text{f}})_2(\text{H}_2\text{O})_2]$              | HULMOQ                | $\text{L}^{\text{f}} = \text{malonic acid}$                                                             |
| $[\text{Cu}_2(\text{L}^{\text{g}})_2(\text{H}_2\text{O})_2] \cdot 2\text{H}_2\text{O}$                                           | MATLOJ                | $\text{L}^{\text{g}} = 2\text{-di1H-2-imidazolylmethylmalonic acid}$                                    |
| $[\text{Cu}(\text{L}^{\text{h}})(\text{H}_2\text{O})(\text{NO}_3)]$                                                              | NUQKOZ01              | $\text{L}^{\text{h}} = 2\text{-}(o\text{-hydroxyphenyliminomethyl})\text{pyridine}$                     |

|                                                                                                                                      |        | N-oxide                                                                        |
|--------------------------------------------------------------------------------------------------------------------------------------|--------|--------------------------------------------------------------------------------|
| $[\text{Cu}(\text{L}^i)_2(\text{H}_2\text{O})_2]_n$                                                                                  | FAHNAE | $\text{L}^i = 2\text{-hydroxy-1,4-naphthoquinone}$                             |
| $[\text{Cu}(\text{L}^j)(\text{H}_2\text{O})] \cdot 4\text{H}_2\text{O}$                                                              | SAGLAC | $\text{L}^j = \text{N-Salicylideneglycine}$                                    |
| $[\text{NiCl}_2(\text{L}^k)_2]$                                                                                                      | FUJQOQ | $\text{L}^k = \text{phenylenediamine}$                                         |
| $[\text{Cu}(\text{HL}^l)(\text{L}^l)(\text{H}_2\text{O})_2]\text{NO}_3$                                                              | AETCUB | $[\text{L}^l = 2\text{-amino-2-methylpropanol}]$                               |
| $[\text{Cu}(\text{HL}^m)(\text{L}^m)]_2(\text{NO}_3)_2$                                                                              | AETCUA | $\text{L}^m = 2\text{-aminoethanol}$                                           |
| $\{\{\text{Cu}(\text{H}_2\text{L}^n)\}\{\text{Cu}(\text{Hsabhea})\}\}\text{BF}_4$                                                    | ODALAG | $\text{L}^n = \text{N-salicylidene-2-(bis(2-hydroxyethyl)amino)ethylamine}$    |
| $\{\{\text{Cu}(\text{H}_2\text{L}^n)\}\}_2(\text{BF}_4)_2$                                                                           | ODALEK | $\text{L}^n = \text{N-salicylidene-2-(bis(2-hydroxyethyl)amino)ethylamine}$    |
| $[\text{Cu}(\text{HL}^o)(\text{L}^o)]\text{PF}_6$                                                                                    | MASQIJ | $\text{L}^o = 2\text{-pyridylmethanol}$                                        |
| $[\text{Cu}(\text{HL}^p)(\text{L}^p)]\text{BF}_4 \cdot 2\text{H}_2\text{O}$                                                          | YUKCOX | $\text{HL}^p = \text{N-t-butyl-N-2-pyridylhydroxylamine}$                      |
| $[\text{Cu}(\text{L}^q)_2(\text{L}^r)(\text{H}_2\text{O})_2]$                                                                        | BUQLIJ | $\text{L}^q = 3\text{-nitrobenzoate}; \text{L}^r = \text{nicotinamide}$        |
| $\text{cis-}[\text{Cu}(\text{L}^s)_2(\text{H}_2\text{O})_2]$                                                                         | NEDPAO | $\text{L}^s = 4\text{-formyl-2-methoxyphenolato}$                              |
| $\text{trans-}[\text{Cu}(\text{L}^s)_2(\text{H}_2\text{O})_2] \cdot \text{H}_2\text{O}$                                              | PAXTUE | $\text{L}^s = 4\text{-formyl-2-methoxyphenolato}$                              |
| $[\text{Ni}_3(\text{L}^t)(\text{CO}_3)(\text{H}_2\text{O})(\text{py})_7]$                                                            | GIDNAK | $\text{L}^t = 2,6\text{-bis(5-(2-hydroxyphenyl)-pyrazol-3-yl)pyridine}$        |
| $\{\{\text{Mn}(\text{bpy})\text{H}_2\text{O}\}\}\{\text{L}^u\}_2(\mu\text{-O})\{\text{Mn}(\text{bpy})(\text{ClO}_4)\}\}\text{ClO}_4$ | AGOJOY | $\text{L}^u = \mu\text{-2,6-dichlorobenzoato}; \text{bpy} = \text{bipyridine}$ |
| $\{\{\text{Mn}(\text{bpy})\text{H}_2\text{O}\}\}\{\text{L}^u\}_2(\mu\text{-O})\{\text{Mn}(\text{bpy})(\text{NO}_3)\}\}\text{NO}_3$   | AGOJUE | $\text{L}^u = \mu\text{-2,6-dichlorobenzoato}; \text{bpy} = \text{bipyridine}$ |

|                                                                                             |         |                                                                                                                       |
|---------------------------------------------------------------------------------------------|---------|-----------------------------------------------------------------------------------------------------------------------|
| $[\text{Fe}(\text{L}^{\text{V}})\text{Cl}(\text{H}_2\text{O})]\cdot\text{MeOH}$             | AZOXAO  | $\text{L}^{\text{V}} = 3,6,9,12\text{-tetra-aza-1(2,6)-pyridinacyclotridecaphane-2,13-dione}$                         |
| $[(\text{Ni}(\text{L}^{\text{W}})_2)_3(\text{Fe}(\text{CN})_6)_2]\cdot 7\text{H}_2\text{O}$ | ROQCAB  | $\text{L}^{\text{W}} = \text{Bis(1-pyrazolyl)methane}$                                                                |
| $\{\text{Mn}(\text{OH})(\text{OAc})_2\}\cdot\text{AcOH}\cdot\text{H}_2\text{O}\}_n$         | HUWHOW  | AcOH= acetic acid                                                                                                     |
| $[\text{FeL}^1(\text{NCS})_2]$                                                              | 2036380 | $\text{HL}^1 = 2\text{-}[1\text{-}[[2\text{-}[(2\text{-aminoethyl)amino]ethyl]imino]ethyl]phenol}$<br>and             |
| $[\text{FeL}^2(\text{N}_3)\text{Cl}]$                                                       | 2036381 | $\text{HL}^2 = 2\text{-}(-1\text{-}(2\text{-}(2\text{-aminoethylamino)ethylimino)ethyl)\text{-}4\text{-methylphenol}$ |

## References

- 1 (a) T. Basak, K. Ghosh and S. Chattopadhyay, *Polyhedron*, 2018, **146**, 81–92; (b) P. Bhowmik, S. Jana, P. P. Jana, K. Harms and S. Chattopadhyay, *Inorg. Chim. Acta*, 2012, **390**, 53–60; (c) D. Maity, S. Chattopadhyay, A. Ghosh, M. G.B. Drew and G. Mukhopadhyay, *Polyhedron*, 2009, **28**, 812–818; (d) M. Das, S. Chatterjee, K. Harms, T. K. Mondal and S. Chattopadhyay, *Dalton Trans.*, 2014, **43**, 2936–2947
- 2 (a) S. Roy, M. G. B. Drew, A. Frontera and S. Chattopadhyay, *ChemistrySelect*, 2017, **2**, 7880–7887; (b) S. Chattopadhyay, M. S. Ray, S. Chaudhuri, G. Mukhopadhyay, G. Bocelli, A. Cantoni and A. Ghosh, *Inorg. Chim. Acta*, 2006, **359**, 1367–1375.

3 T. Basak, A. Bhattacharyya, M. Das, K. Harms, A. Bauza, A. Frontera and S. Chattopadhyay, *ChemistrySelect* 2017, **2**, 6286– 6295.

4 I. Nemeč, R. Herchel and Z. Trávníček, *Dalton Trans.*, 2015, **44**, 4474–4484.

5 T. Basak, K. Ghosh, C. J. Gómez-García and S. Chattopadhyay, *Polyhedron* 2018, **146**, 42–54.

6 S. Naiyaa, S. Giri, S. Biswas, M. G.B. Drew and A. Ghosh, *Polyhedron*, 2014, **73**, 139–145.

7 R. Biswas, C. Diaz, A. Bauzá, A. Frontera and A. Ghosh, *Dalton Trans.*, 2013, **42**, 12274–12283.

8 S. Jana, A. Bhattacharyya, B. N. Ghosh, K. Rissnen, S. Herrero, R. J.-Aparicio and S. Chattopadhyay, *Inorg. Chim. Acta*, 2016, **453**, 715–723.

9 F. Banse, V. Balland, C. Philouze, E. Riviere, L. Tchertanova, and J.-J. Girerd, *Inorg. Chim. Acta*, 2003, **353**, 223-230.

10 R. Biswas, M. G. B. Drew, C. Estarellas, A. Frontera and A. Ghosh, *Eur. J. Inorg. Chem.*, **2011**, 2558–2566.
